# Supplementary material for: First measurements of 3-Dimensional winds up to 25 km based on Aerosol backscatter using a compact Doppler lidar with multiple fields of view
Source: Copernicus journal article supplement (doi:10.5194/egusphere-2023-1924), 2023-09-26
Supplement: Supplementary file [file egusphere-2023-1924-AC2-supplement.pdf]

***Very interesting paper. However, we at ECMWF would like some clarifications regarding the use of the ECMWF vertical wind component, which is compared to the lidar observations.***

*Vertical wind is not something we would expect the ECMWF IFS (normal set-up) to capture well, especially in the hydrostatic model that diagnoses it from vertical derivative of the horizontal divergence of the wind field.*

*Could you confirm how you calculate the vertical wind in [m/s] as we provide it in MARS as omega (so in units of [Pa/s]). Do you use the hydrostatic approximation to say  $w = -\omega / (\rho * g)$ ?*

*And most importantly, do you make sure that you retrieve the full resolution data from MARS at 9 km rather than the truncated field (this is a common mistake by many). For horizontal wind this should not matter too much as it has a lot of power in low wavenumbers, but for the vertical winds this will most likely lead to a severe under-estimation as most of the power is in large wavenumbers that will be ignored by truncation.*

*Kind regards*

Thank you for looking into this, we are very happy to share details that we may want to include in a revised manuscript.

*Could you confirm how you calculate the vertical wind in [m/s] as we provide it in MARS as omega (so in units of [Pa/s]). Do you use the hydrostatic approximation to say  $w = -\omega / (\rho * g)$ ?*

**Yes we confirm that w is calculated as you describe.**

#### **In Detail:**

```
modlevel = ncv["level"][:]  
surface_geop = ncv["z"][:,0, IDX, :]  
lnsp = ncv["lnsp"][:,tstep, 0, IDX, :]  
T = ncv["t"][tstep, :, IDX, :]  
Q = ncv["q"][tstep, :, IDX, :]  
wpress = ncv["w"][tstep, :, IDX, :]  
  
plevel, phlevel = calc_ECMWF_press_3d(lnsp, modlevel=modlevel)  
  
geop = calc_ECMWF_geop_3d(phlevel, T, Q, surface_geop)  
Tv = T_virtual(T, Q)  
  
z, g = calc_ECMWF_altitude_g_3d(geop, latitude)  
  
rho = calc_density(plevel, Tv)  
  
w = wpress / (-rho * g)
```

**Where „wpress“ is „omega“ in [Pa/s]**

*And most importantly, do you make sure that you retrieve the full resolution data from MARS at 9 km rather than the truncated field:*

**We specify the full spectral resolution with „res=1279“ statement.**

However we noticed that the keyword may have changed to „resol“

<https://confluence.ecmwf.int/pages/viewpage.action?pageId=171422484>

**Please find below the complete retrieve statements:**

```
server = ecmwfapi.ECMWFService("mars")
...
basepar={
    "stream" : "oper",
    "class" : "od",
    "type" : "an",
    "expver" : "1",
    "date" : "{}".format(date),
    "time" : "0",
    "grid" : "0.25/0.25",
    "levtype" : "ml",
    "levelist": "1",
    "area" : "{}/{} / {}/{}".format(latlim[1], lonlim[0], latlim[0], lonlim[1]),
    "domain" : "A",
    "res" : "1279",
    "param" : "129.128",
}
b=basepar.copy()

execute(server, basepar, filekey + "_1.grb")

b["param"]="152.128"
b["type"]="fc"
b["time"]="0/12"
b["step"]="0/1/2/3/4/5/6/7/8/9/10/11"

execute(server, b, filekey + "_2.grb")

b["param"]="T/U/V/W/O3/155.128/138.128/133.128/248.128"
b["levelist"]="1/to/{}".format(levno)

execute(server, b, filekey + "_3.grb")

combine_forecast_modlev(filekey)
```

We like to mention that the downsampling to the 0.25° grid (to save space) lead to slightly uncertain results.

We repeated the retrieval and sampled on a 0.125/0.0625 grid and observed differences of less than 0.1 m/s in the vertical wind.

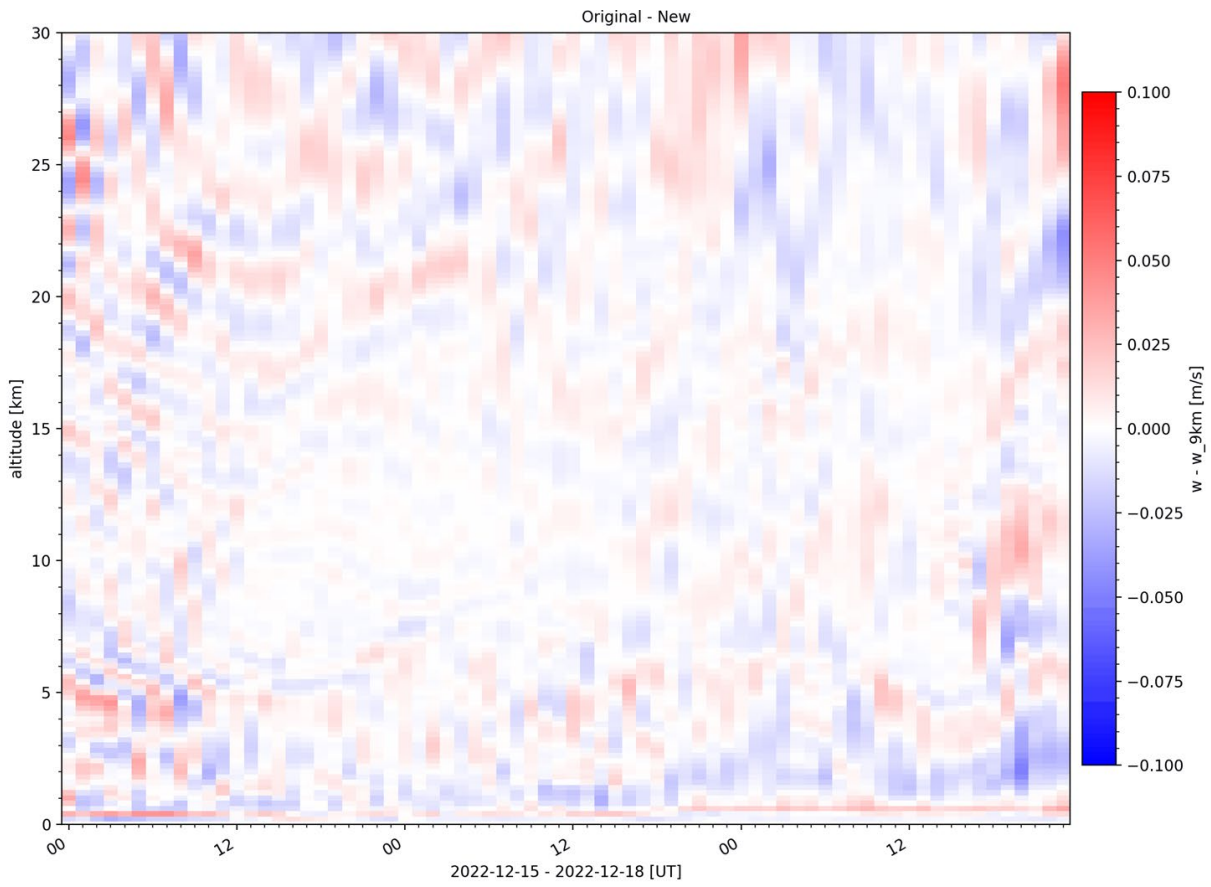

2023-10-09 16:02:56

Fig. 1: Vertical wind differences of data sampled on a 0.25/0.25 grid minus 0.125/0.0625 grid.

For the meridional wind gradient we find most often differences of less than 1 m/s

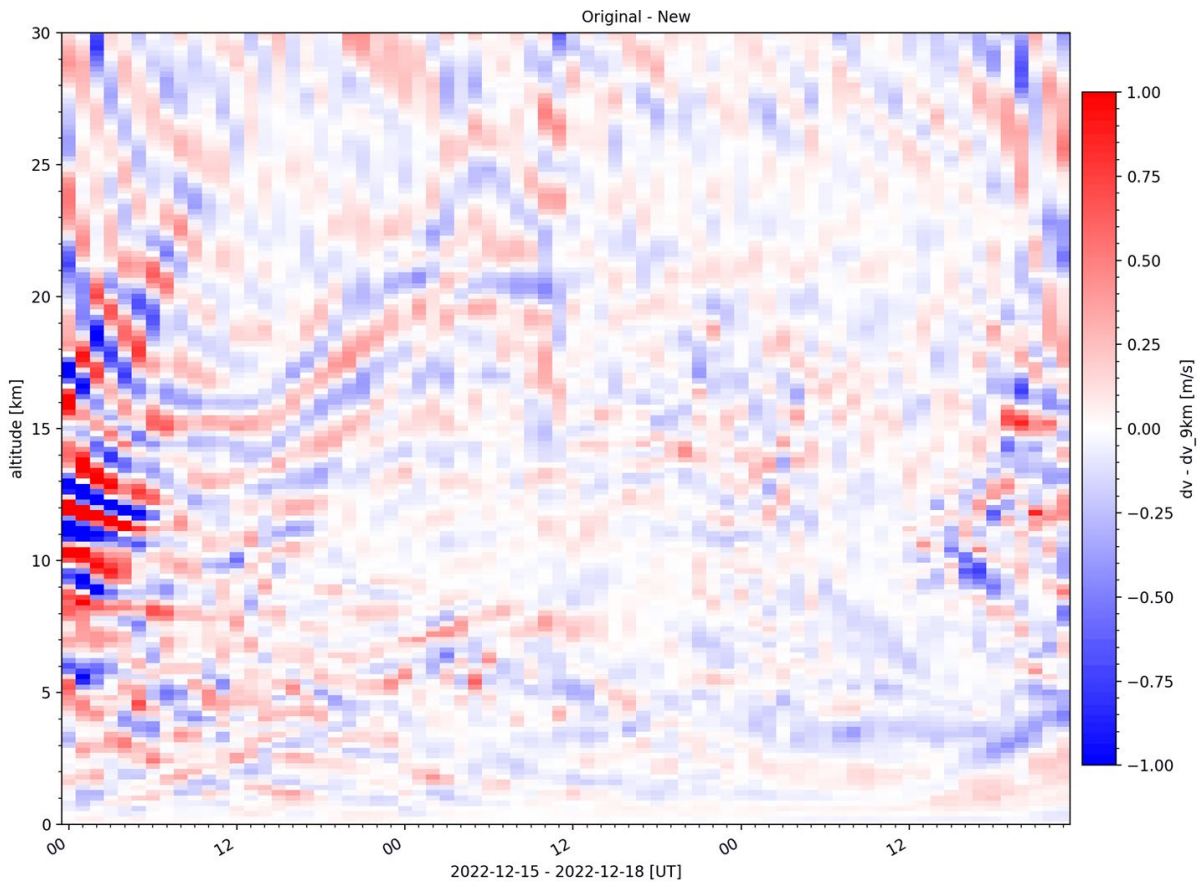

2023-10-09 16:02:55

Fig. 2: Meridional wind gradient differences of data sampled on a 0.25/0.25 grid minus 0.125/0.0625 grid.

We can also confirm, that the effect on the horizontal winds and especially on the observation of the wind gradient is not affected by this.

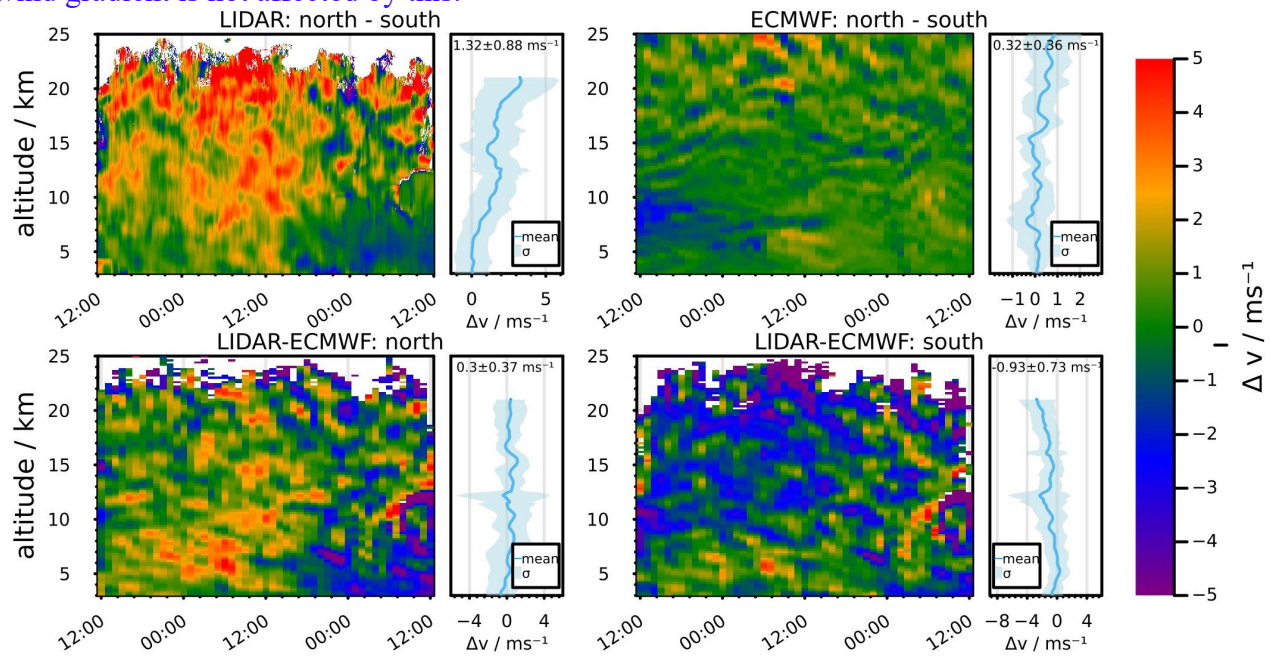

Fig. 3: Same as Figure 9 in the Paper, but with the updated ECMWF retrieval. No significant difference is visible.

During our investigation of Figure 9, we realised, that a software error caused the observational filter to not be correctly applied. We corrected this, leading to a slightly changed figure 9. The conclusions drawn from the figure remain the same.

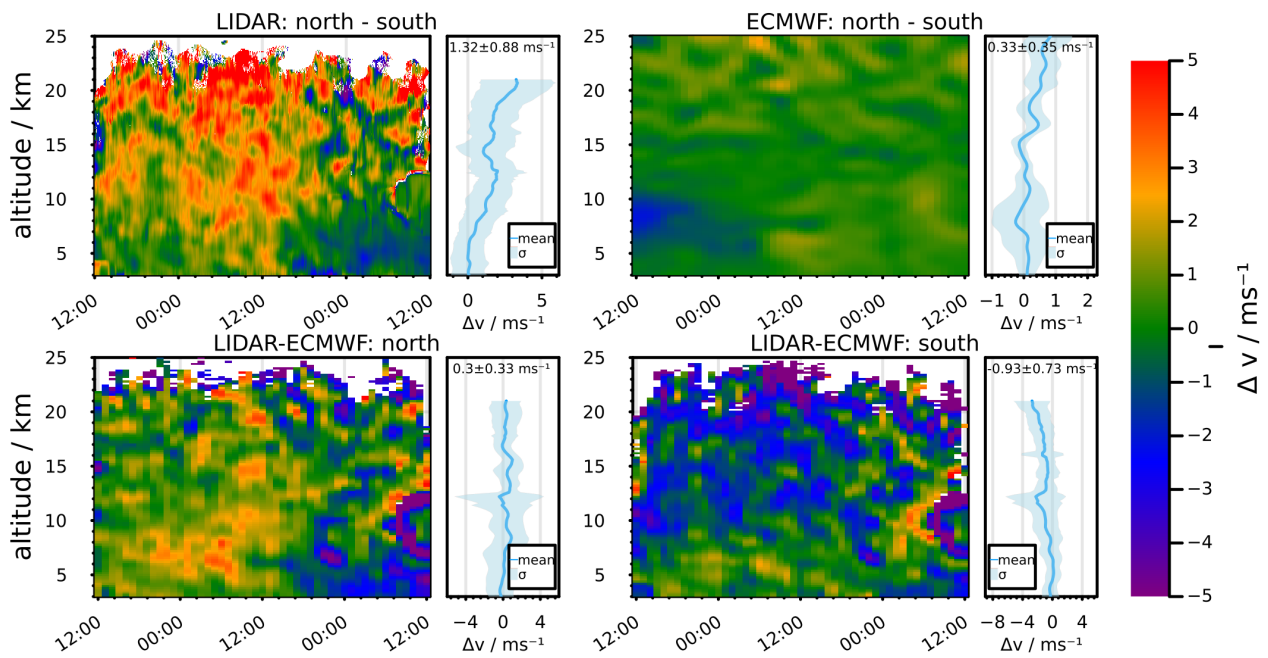

Fig. 4: Updated figure 9, with corrected observational filtering applied to the ECMWF data.
